# Supplementary material
Source: publisher site journal article supplement (https://www.dovepress.com/article/488226)
Supplement: Supplementary file 1 [file get_supplementary_file.php]

Table S1 More Se and disease clinical trials

| Conditions | NCT Number | Study Status | Phases | Date | Interventions | Sponsor |
| --- | --- | --- | --- | --- | --- | --- |
| HIV infections | NCT00197561 | completed | 3 | 2024-2024 | Se | Harvard School of Public Health |
| NCT00149656 | completed | NA | 2024-2024 | Florida International University |
| NCT03421314 | unknown | NA | 2016-2024 | Instituto Nacional de Enfermedades Respiratorias |
| sepsis | NCT01601938 | withdrawn | 2 | 2024-2024 | Se | Gil Joon Suh |
| NCT00207844 | completed | 2 | 2024-2024 | Selenate | Centre Hospitalier de Meaux |
| stem cell transplantation | NCT04080622 | unknown | 3 | 2024-2024 | Se | University Hospital |
| NCT01432873 | unknown | 1/2 | 2024-2024 | Se | Tehran University of Medical Sciences |
| anterior segment ischemia | NCT04005222 | completed | early 1 | 2024-2024 | Se | Beytepe Murat Erdi Eker State Hospital |
| cardiac arrest | NCT01390506 | withdrawn | 2 | 2024-2024 | Selenate | Medical University of Graz |
| ischemic stroke | NCT02505295 | completed | NA | 2024-2024 | Se | Mazandaran University of Medical Sciences |
| COVID19 | NCT04869579 | unknown | 2 | 2021-2021 | Se | CHRISTUS Health |
| clear cell renal cell carcinoma | NCT02535533 | not recruiting | 1/2 | 2024-2026 | SeMet | Yousef Zakharia |
| type 2 diabetes | NCT05320510 | not recruiting | NA | 2022-2023 | Se yeast | Huazhong University of Science and Technology |
| Chronic Lymphocytic Leukemia | NCT05136378 | recruiting | NA | 2021-2025 | Se yeast | Shanghai Zhongshan Hospital |

Table S2 More clinical trials on myocardial fibrosis

| Interventions | NCT Number | Study Status | Phases | Date | Sponsor |
| --- | --- | --- | --- | --- | --- |
| myocardial fibrosis | NCT04128891 | withdrawn | 2 | 2020-2020 | Flinders University |
| NCT04687111 | unknown | 2 | 2015-2021 | Mark Ledwidge |
| eplerenone | NCT00401856 | completed | 4 | 2007-2013 | Royal Brompton Harefield NHS Foundation Trust |
| NCT01971593 | terminated | 4 | 2013-2016 | Washington University School of Medicine |
| furosemide | NCT04628325 | completed | 3 | 2017-2019 | University of Palermo |
| angiotensin receptor-neprilysin inhibition | NCT05089539 | unknown | 2 | 2021-2022 | Chongqing Medical University |
| torasemide | NCT00409942 | completed | 4 | 2007-2009 | Ferrer Internacional S.A. |
| atorvastatin | NCT00795912 | completed | 4 | 2003-2005 | St Vincent's University Hospital, Ireland |

Table S3 More clinical trials on liver fibrosis

| NCT Number | Study Status | Phases | Date | Interventions | Sponsor |
| --- | --- | --- | --- | --- | --- |
| NCT02400216 | completed | 2 | 2015-2017 | dual cholate | National Institute of Diabetes and Digestive and Kidney Diseases |
| NCT00119119 | terminated | 3 | 2024-2024 | pentoxyphilline | French National Agency for Research on AIDS and Viral Hepatitis |
| NCT03770936 | recruiting | 3 | 2018-2024 | candesartan | Sherief Abd-Elsalam |
| NCT04908657 | recruiting | 4 | 2017-2023 | sildenafil | National Taiwan University Hospital |
| NCT05224128 | unknown | 1/2 | 2021-2022 | imatinib | Research Institute for Gastroenterology and Liver Diseases |
| NCT05905172 | recruiting | 3 | 2023-2028 | hydronidone capsules | Beijing Continent Pharmaceutical Co, Ltd. |
| NCT05115942 | recruiting | 3 | 2021-2024 |
| NCT04971577 | recruiting | 2/3 | 2022-2024 | Simvastatin | Anna Cruceta |
| NCT04099407 | unknown | 2 | 2019-2020 | pirfenidone | Grupo Mexicano para el Estudios de las Enfermedades Hepaticas |
| NCT06293378 | recruiting | NA | 2024-2028 | sulfasalazine | The Second Affiliated Hospital of Chongqing Medical University |
| NCT05939947 | recruiting | 1 | 2023-2024 | ALE.F02 | Alentis Therapeutics AG |
| NCT05473806 | not recruiting | 4 | 2020-2023 | Pioglitazone | Seung Up Kim |
| NCT06005012 | recruiting | 2 | 2023-2024 | Semaglutide | University of California, San Diego |
| NCT02289300 | withdrawn | 2 | 2024-2024 | DCB-BO1202 | A2 Healthcare Taiwan Corporation |
| NCT03568578 | unknown | NA | 2018-2021 | entecavir | Peking University First Hospital |
| NCT04640129 | recruiting | 4 | 2021-2024 | tenofovir disoproxil fumarat | Third Affiliated Hospital, Sun Yat-Sen University |
| NCT03920605 | unknown | NA | 2019-2021 |
| NCT03919565 | unknown | NA | 2019-2021 |
| NCT03957629 | unknown | NA | 2019-2023 |

Table S4 More clinical trials on pulmonary fibrosis

| Conditions | NCT Number | Study Status | Phases | Date | Interventions | Sponsor |
| --- | --- | --- | --- | --- | --- | --- |
| IPF | NCT04552899 | completed | 3 | 2021-2023 | PRM-151 | Hoffmann-La Roche |
| NCT02874989 | completed | 1 | 2016-2019 | dasatinib | Wake Forest University Health Sciences |
| NCT00131274 | completed | 2/3 | 2003-2007 | imatinib mesylate | Daniels, Craig E., M.D. |
| NCT00517933 | completed | 3 | 2007-2009 | sildenafil citrate | Duke University |
| NCT01462006 | completed | NA | 2011-2016 | sirolimus | University of Virginia |
| NCT02502097 | completed | 2 | 2015-2016 | gefapixant | Afferent Pharmaceuticals, Inc., a subsidiary of Merck & Co., Inc. |
| NCT00063869 | completed | 2 | 2005-2005 | etanercept | Wyeth is now a wholly owned subsidiary of Pfizer |
| NCT04968574 | completed | 2 | 2021-2023 | taladegib | Endeavor Biomedicines, Inc. |
| NCT05130970 | completed | 2 | 2022-2024 | CSL312 | CSL Behring |
| NCT03727802 | completed | 1 | 2018-2022 | TRK-250 | Toray Industries, Inc |
| NCT02738801 | completed | 2 | 2016-2017 | GLPG1690 | Galapagos NV |
| NCT01362231 | completed | 1 | 2010-2012 | GS-6624 | Gilead Sciences |
| NCT00903331 | completed | 2 | 2009-2011 | ACT-064992 | Actelion |
| NCT00631475 | completed | 3 | 2008-2010 | bosentan | Actelion |
| NCT00125385 | completed | 1 | 2005-2008 | GC1008 | Genzyme, a Sanofi Company |
| NCT00074698 | completed | 1 | 2003-2004 | FG-3019 | FibroGen |
| NCT02345070 | completed | 2 | 2015-2017 | SAR156597 | Sanofi |
| NCT02477709 | completed | 2 | 2015-2015 | gefapixant | Afferent Pharmaceuticals, Inc., a subsidiary of Merck & Co., Inc. |
| NCT00463983 | completed | 1/2 | 2006-2010 | octreotide | Institut National de la Santé Et de la Recherche Médicale, France |
| CF | NCT04527354 | completed | 2 | 2020-2021 | treamid | Pharm Enterprises LLC |
| NCT04176328 | completed | 1 | 2019-2020 | teicoplanin | Neupharma Srl |
| NCT03748199 | completed | 1/2 | 2018-2020 | pol6014 | Santhera Pharmaceuticals |
| NCT03229252 | completed | 2 | 2017-2019 | spx-101 | Spyryx Biosciences,Inc. |
| NCT03056989 | completed | 1 | 2017-2017 | spx-102 | Spyryx Biosciences, Inc. |
| NCT02566044 | completed | 1/2 | 2017-2018 | QBW276 | Novartis Pharmaceuticals |
| NCT01944735 | completed | 1 | 2013-2014 | CTX-4430 | Celtaxsys, Inc. |
| NCT01641822 | completed | 3 | 2012-2015 | azli | Gilead Sciences |
| NCT01316276 | completed | 3 | 2012-2015 | liposomal amikacin for inhalation | Insmed Incorporated |
| NCT01069705 | completed | 3 | 2010-2012 | tobramycin inhalation powder | Novartis Pharmaceuticals |
| NCT01199887 | completed | 1 | 2010-2012 | IW001 | ImmuneWorks |
| NCT00719381 | completed | 1 | 2008-2009 | pioglitazone | Paul Beringer |
| NCT00794586 | completed | 2 | 2008-2010 | fti/azli | Gilead Sciences |
| NCT00359736 | completed | 2 | 2006-2009 | sildenafil | VA Office of Research and Development |
| NCT00043342 | completed | 1/2 | 2002-2003 | IFN γ-1b | InterMune |
| NCT04541680 | recruiting | 3 | 2020-2024 | nintedanib | Assistance Publique - Hpitaux de Paris |
| NCT04619680 | active, not recruiting | 4 | 2020-2024 | Icahn School of Medicine at Mount Sinai |
| ILD | NCT05139719 | recruiting | 2 | 2023-2026 | HEC585 | Sunshine Lake Pharma Co., Ltd. |
| NCT05892614 | recruiting | 2 | 2023-2024 | efzofitimod | aTyr Pharma, Inc. |
| NCT05828953 | recruiting | 2/3 | 2021-2024 | anlotinib | First Affiliated Hospital of Wenzhou Medical University |
| COVID-19 | NCT04856111 | active, not recruiting | 4 | 2021-2022 | pirfenidone | Postgraduate Institute of Medical Education and Research |
| NCT04818489 | active, not recruiting | 4 | 2021-2023 | colchicine | ClinAmygate |
| NCT04912011 | unknown | 4 | 2021-2021 | canrenoate potassium | Pomeranian Medical University Szczecin |
| NCT04338802 | unknown | 2 | 2020-2020 | nintedanib | Huilan Zhang |
